# Supplementary material for: Vapour phase deposition of phosphonate-containing alumina thin films using dimethyl vinylphosphonate as precursor
Source: Royal Society of Chemistry journal article supplement (doi:10.1039/d4dt02851a), 2025-01-01
Supplement: d4dt02851a1.pdf [file d4dt02851a1.pdf]

**SUPPLEMENTARY INFORMATION TO:**

**Vapour Phase Deposition of**

**Phosphonate-containing Alumina Thin Films**

**using Dimethyl Vinylphosphonate as Precursor**

Juan Santo Domingo Peñaranda, Arpan Dhara, Aditya Chalishazar, Matthias M.  
Minjauw, Jolien Dendooven, and Christophe Detavernier\*

*Department of Solid State Sciences, CoCooN research group, Ghent University, Krijgslaan  
281 (S1), 9000 Gent, Belgium*

E-mail: [christophe.detavernier@ugent.be](mailto:christophe.detavernier@ugent.be)

Table 1: Atomic concentrations obtained from XPS measurements on the air-exposed sample surfaces.

| Process | Temperature °C | Al 2p (at%) | C 1s (at%) | O 1s (at%) | P 2s (at%) | F 1s (at%) |
|---------|----------------|-------------|------------|------------|------------|------------|
| ABCD    | 100            | 26.5        | 28.4       | 40.9       | 2.5        | 1.7        |
| ABCD    | 175            | 23.9        | 32.1       | 38.9       | 4.1        | 1.1        |
| ABCD    | 250            | 22.6        | 24.6       | 41.5       | 6.0        | 5.3        |
| ABC     | 250            | 24.4        | 33.1       | 38.4       | 4.1        | -          |

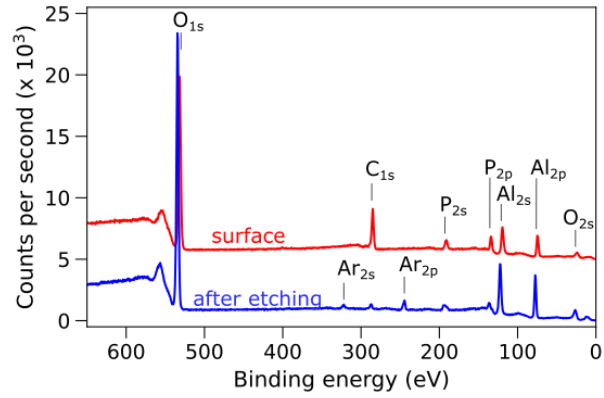

Figure 1: The effect of an Ar ion etching step on a representative XPS survey scan is illustrated for the ABCD-250°C sample. The C 1s, P 2s and P 2p photo-emission lines drop drastically in intensity after etching. No energy calibration was performed.

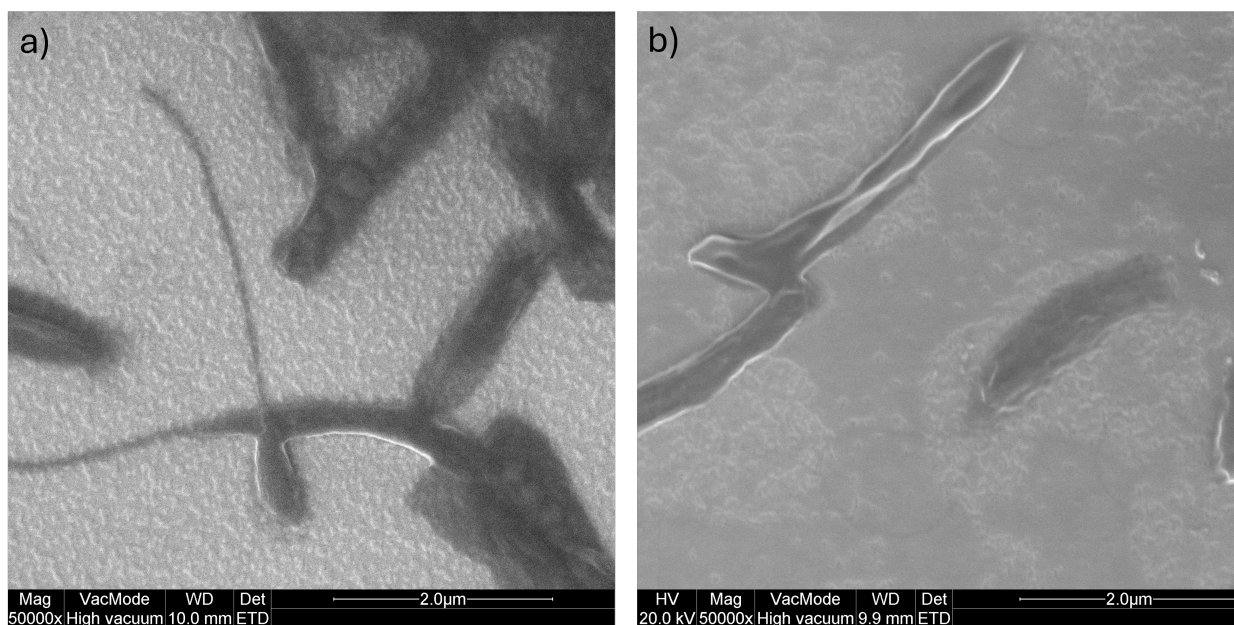

Figure 2: Secondary electron microscopy images of the ABCD (a) and ABC (b) films after the water stability test. FTIR showed that both films were oxidized and that carboxylate species were generated after 1 week in water (Figure 7 in the main manuscript). The SEM images show the formation of cracks and a clear roughening of the film surface. The as-deposited films remained featureless in SEM.
